# Supplementary material for: First trimester antenatal care contact in Africa: a systematic review and meta-analysis of prevalence and contributing factors
Source: BMC Pregnancy Childbirth. 2023 Oct 19;23:742. doi: 10.1186/s12884-023-06034-1 (PMC10585910; doi:10.1186/s12884-023-06034-1)
Supplement: Supplementary file 2 — Additional file 2. Quality appraisal of included study. [file 12884_2023_6034_MOESM2_ESM.pdf]

## Additional file 2. Quality appraisal of included study

## JBI Critical Appraisal Checklist for Analytical Cross Sectional Studies

[illegible]

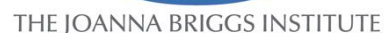

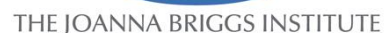

## JBI Critical Appraisal Checklist for Case-control Studies

[illegible]
